# Supplementary material for: Bioactive Phytochemical Composition of Grape Pomace Resulted from Different White and Red Grape Cultivars
Source: MDPI journal article supplement (doi:10.3390/separations9120395), 2022-11-28
Supplement: s1 [file s1]

## SUPPLEMENTARY INFORMATION

### Bioactive phytochemical composition of grape pomace resulted from different white and red grape cultivars

Petronela Anca Oneche <sup>1</sup>, Elisabeta-Irina GEANĂ<sup>2,\*</sup>, Corina Teodora CIUCURE<sup>2</sup>, Alina FLOREA<sup>1,\*</sup>, Dorin Ioan SUMEDREA<sup>1</sup>, Roxana Elena IONETE<sup>2</sup>, Ovidiu TIȚA <sup>3</sup>

<sup>1</sup>National Research&Development Institute for Biotechnology in Horticulture Stefanesti - Arges, Romania, Sos. București-Pitești no 37; anca27il@yahoo.com , alinaflorea964@yahoo.com, dsunedrea@yahoo.com

<sup>2</sup>National Research&Development Institute for Cryogenic and Isotopic Technologies-Râmnicu Vâlcea Romania, strada Uzinei nr.4 , 240050; : irina.geana@icsi.ro, corina.ciucure@icsi.ro , roxana.ionete@icsi.ro

<sup>3</sup> "Lucian Blaga" Sibiu University Romania, blv Victoriei no 10, 550024, ovidiu.tita@ulbsibiu.ro

\*Correspondence: irina.geana@icsi.ro , [alinaflorea964@gmail.com](mailto:alinaflorea964@gmail.com); Tel.: +40745752559,+40747813151 (E.I.G., A.F.)

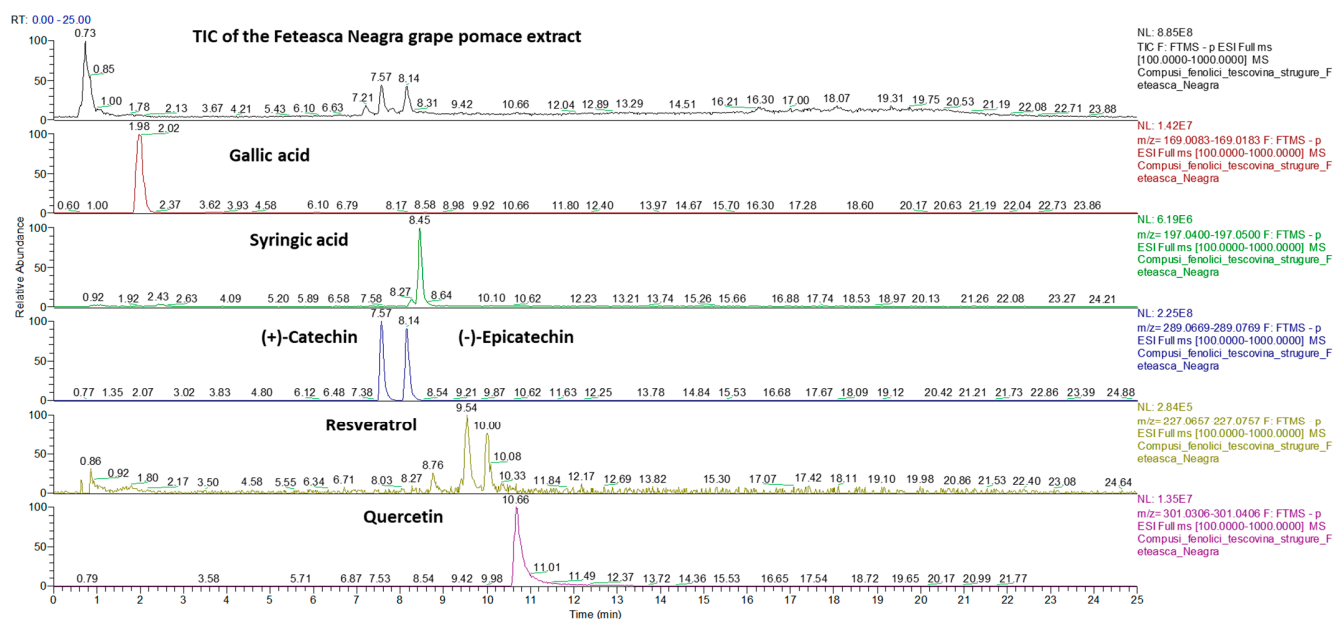

**Figure S1.** TIC and the extracted chromatograms of the main phenolic compounds quantified in Feteasca Neagra grape pomace (the chromatograms were extracted from TIC using a 5 ppm mass accuracy window; negative ion mode, full scan, base peak in the range 75-1000 m/z)

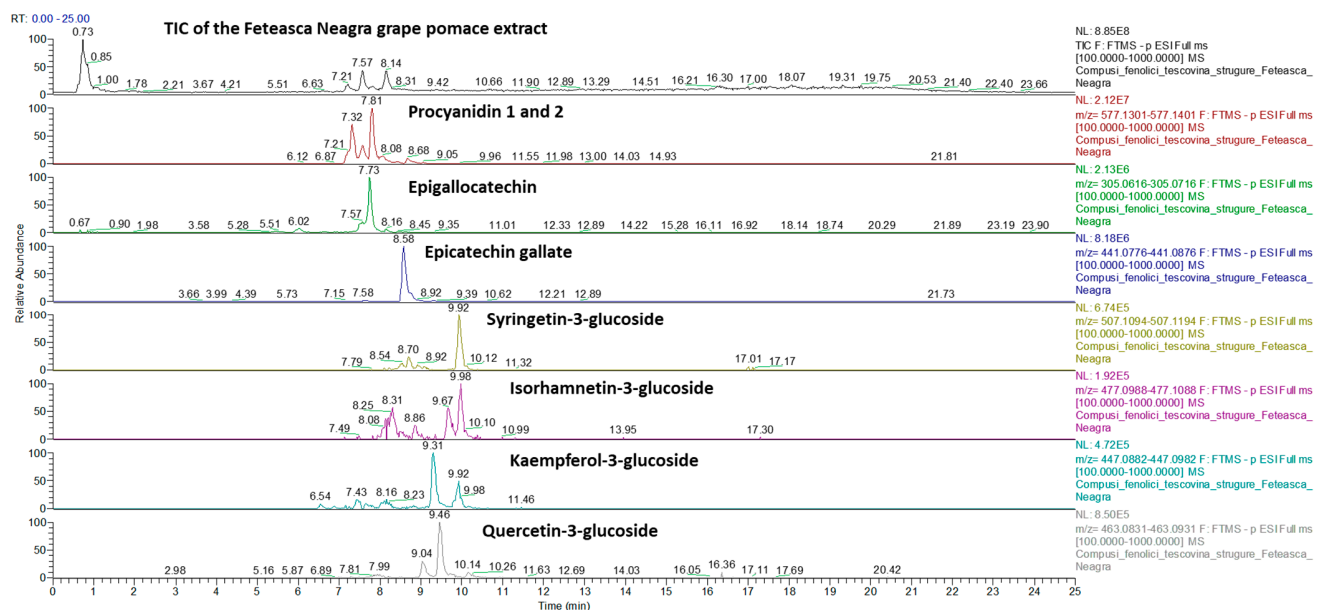

(A)

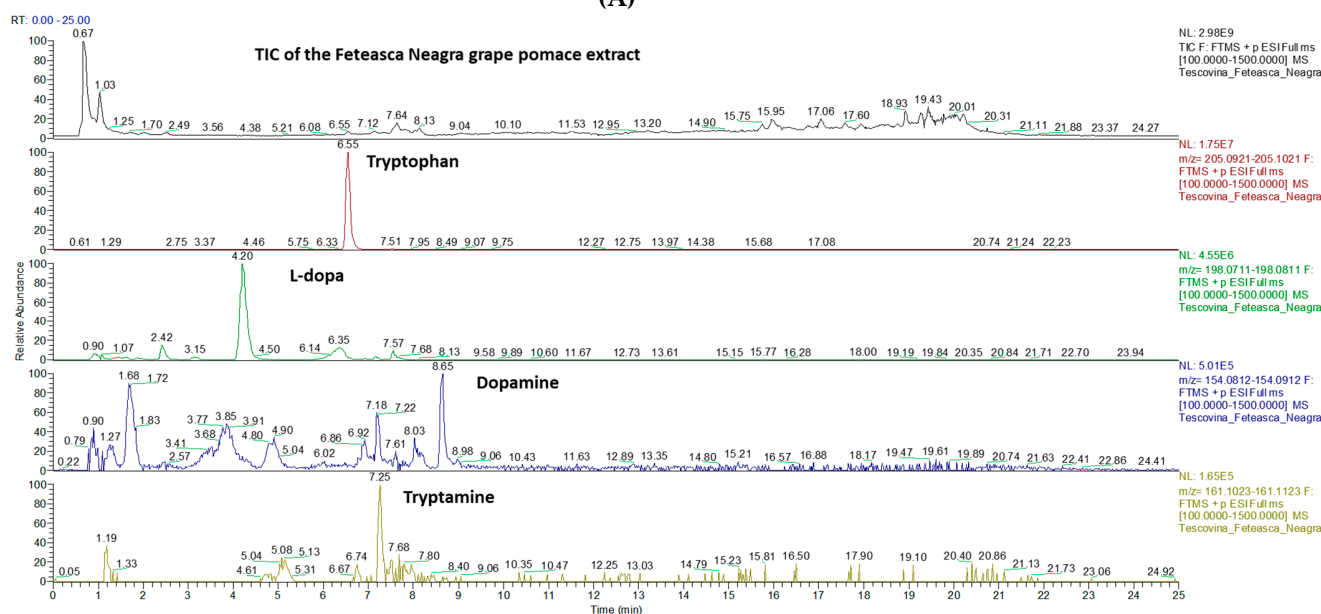

(B)

**Figure S2.** TIC and the extracted chromatograms of the main phenolic compounds (A) and amino acids (B) identified in Feteasca Neagra grape pomace (the chromatograms were extracted from TIC using a 5 ppm mass accuracy window; negative ion mode, full scan, base peak in the range 75-1000 m/z)

**Table S1.** Content of total phenolic compounds (TPC, expressed as GAE), total anthocyanins (TAC, expressed in mg/g), tannins (expressed in mg/g), antioxidant activity (AA, expressed in  $\mu\text{mol}$  Trolox/g), content of total flavonoids (TFC, expressed as QE) in grape pomace

| Grape Pomace                                                                    | TPC                                     | AA                                                     | TAC                                           | TFC                                     | Tannins                                    | references                  |
|---------------------------------------------------------------------------------|-----------------------------------------|--------------------------------------------------------|-----------------------------------------------|-----------------------------------------|--------------------------------------------|-----------------------------|
| Malbec                                                                          | 196,2 $\pm$ 22,7<br>mg GAE/ g           | 2756,0 $\pm$ 109,1<br>$\mu\text{mol}$ TE/g             | -                                             | -                                       | -                                          | (Antoniolli et al., 2015)   |
| Pinot noir                                                                      | -                                       | -                                                      | 50.616 - 131.868<br>mg/g DW                   | -                                       | -                                          | (Kammerer et al., 2004)     |
| Romy                                                                            | 10.79 $\pm$ 0.23<br>mg GAE/ g           | -                                                      | -                                             | 10.15 $\pm$ 0.14<br>mg QE/g             | 3.32 $\pm$ 0.04<br>mg TE/g                 | (Gaafar et al., 2019)       |
| Banaty                                                                          | 5.81 $\pm$ 0.09<br>mg GAE/ g            | -                                                      | -                                             | 5.89 $\pm$ 0.20<br>mg QE/g              | 1.60 $\pm$ 0.03<br>mg TE/g                 |                             |
| Rare Georgian red grape varieties (Simonaseuli, Adreuli Shavi Sreluri, Gabasha) | 2.79 $\pm$ 0.02<br>g/100g dry           | 79 $\pm$ 0.9 %                                         | 737.0 $\pm$ 0.9<br>mg/100 g                   | 2.32 $\pm$ 0.04<br>g 100 g-1 dry        | 10.51 $\pm$ 0.8<br>mg 100 g-1 productivity | (Gurgenidze et al., 2022)   |
| Merlot                                                                          | 2360.99 $\pm$ 0.77<br>mg GAE 100 g-1 dw | -                                                      | 8.96 $\pm$ 0.02 mg cya-3-<br>glu 100 g-1 dw   | 1793.38 $\pm$ 0.53<br>mg CTE 100 g-1 dw | -                                          | (Ribeiro et al., 2022)      |
| 70% Isabel, 15% Bordo, 10% Carmem and 5% Nagara                                 | 8.58 $\pm$ 0.02<br>mg GAE/g             | 35.94 $\pm$ 0.23<br>$\mu\text{mol}$ TE g <sup>-1</sup> | 1.540 $\pm$ 0.031<br>mg malvi-3,5-<br>diglu/g | -                                       | -                                          | (da Rocha and Noreña, 2021) |
| Riesling                                                                        | 47.94 $\pm$ 0.11<br>mg GAE/g-1          | 57.45 $\pm$ 0.42<br>mg AAE.g-1                         | -                                             | -                                       | -                                          | (Vojáčková et al., 2020)    |
| Cabernet Sauvignon                                                              | 5.5 g GAE/100g DM                       | 393 mgAAE/L                                            | 70.3 mg/100g DM                               | 5.4 g QE/<br>100 g DM                   | 12.3 g/L                                   | (Rajha et al., 2014)        |
| Tempranillo                                                                     | 26,8 $\div$ 71,8<br>mg GAE g-1 dw       | 300 $\div$ 800<br>$\mu\text{mol}$ TE/g                 | -                                             | -                                       | -                                          | (Ayuda-Durán et al., 2019)  |
| Cabernet Sauvignon                                                              | 69.83 $\pm$ 4.53mg GAE/g                | 62.74 $\pm$ 1.34 %                                     | 133.79 $\pm$ 6.74 mg<br>CE/g                  | 43.89 $\pm$ 1.22 mg<br>RE/g             | -                                          | (MJ, 2015)                  |
| Chardonnay                                                                      | 58.15 $\pm$ 5.21mg GAE/g                | 68.28 $\pm$ 0.52 %                                     | 92.10 $\pm$ 6.00 mg CE/g                      | 14.32 $\pm$ 1.67 mg<br>RE/g             | -                                          |                             |
| Viognier                                                                        | 99.1 $\pm$ 0.29mg GAE/g                 | 3.54 $\pm$ 0.06 $\mu\text{mol}$ TE/g                   | 0.02 $\pm$ 0.01 mgCyd-3-<br>glu/g             | 75.0 $\pm$ 0.42 mg<br>CE/g              | 98.6 $\pm$ 0.17mg<br>GAE/g                 | (Xu et al., 2016a)          |



|             |                         |                           |             |    |             |                           |                        |                    |                      |
|-------------|-------------------------|---------------------------|-------------|----|-------------|---------------------------|------------------------|--------------------|----------------------|
| Resveratrol | 0.7 ± 0.04              | 4.02 ± 0.39               | 6.40 ± 0.20 | nd | 1.18 ± 0.08 | 36.0 ± 4.9                | 4.54 ± 0.14            | -                  | 7.55 ± 0.31          |
| References  | (Milinčić et al., 2021) | (Rockenbach et al., 2011) |             |    |             | (Antoniolli et al., 2015) | (Ribeiro et al., 2022) | (Xu et al., 2016b) | Carmines Negro, 2021 |

**Table S2 (continued).** Phenolic compounds in grape pomace of different white and red grape cultivars

| Compuși                      | Fetească Neagră             | Cabernet Sauvignon (mg/ g DW) | Riesling Italian (μg/g DW) | Fetească Neagră (μg/g DW) | Cabernet Sauvignon (mg/kg) | Shiraz (mg/100 g) |
|------------------------------|-----------------------------|-------------------------------|----------------------------|---------------------------|----------------------------|-------------------|
| <i>Hydroxybenzoic acids</i>  |                             |                               |                            |                           |                            |                   |
| Gallic acid                  | -                           | 0.73± 0.04                    | -                          | -                         | -                          | 4.42 c ± 0.03     |
| Vanillic acid                | -                           | -                             | -                          | -                         | -                          | -                 |
| Acid siringic                | -                           | -                             | -                          | -                         | -                          | -                 |
| <i>Hydroxycinnamic acids</i> |                             |                               |                            |                           |                            |                   |
| trans -acid cinamic          | -                           | -                             | -                          | -                         | -                          | -                 |
| Caffeic acid                 | -                           | 1.03 ± 0.07                   | -                          | -                         | -                          | 0.62 b ± 0.02     |
| Chlorogenic acid             | -                           | -                             | -                          | -                         | -                          | -                 |
| p-Coumaric acid              | -                           | 0.51±0.02                     | -                          | -                         | -                          | -                 |
| <i>Flavonoids</i>            |                             |                               |                            |                           |                            |                   |
| Catechin                     | 2.59 ± 0.01 mg/g d.w.       | 0.57 ± 0.06                   | -                          | -                         | -                          | 52.30 c ± 1.13    |
| Epicatechin                  | 2.05 ± 0.16 mg/g d.w.       | 0.50±0.05                     | -                          | -                         | -                          | 27.92c± 1.40      |
| Quercetin                    | -                           | 0.07 ± 0.02                   | -                          | -                         | 122.6±10.0                 | 0.44 ± 0.03       |
| Rutin                        | -                           | -                             | -                          | -                         | -                          | 23.70 b ± 0.87    |
| Kaempferol                   | -                           | nd                            | -                          | -                         | 28.7±2.8                   | 0.16 b ± 0.02     |
| <i>Stilbenoids</i>           |                             |                               |                            |                           |                            |                   |
| Resveratrol                  | 12.27 ± 3.07 μg/g d.w       | 0.09 ± 0.04                   | 1.41 ± 0.76                | 5.38 ± 0.43               | -                          | 3.02 ± 0.10       |
| References                   | Ștefania Silvia Balea, 2018 | Carmines Negro, 2021          | Maria L. Muncaciu,2017     |                           | Ghislaine Hilbert, 2015    | L. Butkhupl, 2010 |

**Table S3.** Correlation matrix and Pearson coefficients of determination for individual phenolic compounds in grape pomaces

| Variables                 | pinostrobin | resveratrol   | p-Coumaric acid | Syringic acid | Gallic acid  | Caffeic acid  | kaemferol    | Absciscic acid | Chlorogenic acid | t-Ferulic acid | 4-Hydroxybenzoic acid | Ellagic acid  | Cinnamic acid | 3,4-Dihydroxybenzoic acid | catechin      | quercetin     | isorhamnetin  | epi-catechin  | rutin  |
|---------------------------|-------------|---------------|-----------------|---------------|--------------|---------------|--------------|----------------|------------------|----------------|-----------------------|---------------|---------------|---------------------------|---------------|---------------|---------------|---------------|--------|
| pinostrobin               | 1           | 0.418         | -0.483          | -0.190        | -0.237       | 0.027         | 0.183        | -0.143         | -0.117           | -0.037         | -0.283                | 0.055         | -0.010        | 0.162                     | -0.389        | 0.448         | 0.745         | -0.562        | -0.429 |
| resveratrol               | 0.418       | 1             | <b>-0.913</b>   | -0.317        | -0.024       | 0.358         | 0.553        | -0.559         | 0.708            | 0.385          | 0.525                 | 0.385         | 0.295         | 0.153                     | -0.506        | 0.494         | 0.573         | -0.159        | 0.048  |
| p-Coumaric acid           | -0.483      | <b>-0.913</b> | 1               | 0.475         | 0.350        | -0.037        | -0.371       | 0.370          | -0.495           | -0.022         | -0.179                | -0.104        | -0.080        | 0.077                     | 0.246         | -0.205        | -0.502        | 0.113         | 0.079  |
| Syringic acid             | -0.190      | -0.317        | 0.475           | 1             | 0.520        | 0.660         | 0.456        | -0.488         | -0.294           | -0.124         | 0.102                 | 0.228         | -0.020        | 0.236                     | -0.280        | 0.420         | 0.208         | -0.391        | -0.541 |
| Gallic acid               | -0.237      | -0.024        | 0.350           | 0.520         | 1            | <b>0.809</b>  | 0.574        | -0.422         | 0.443            | 0.534          | 0.475                 | 0.403         | 0.081         | 0.108                     | -0.163        | 0.428         | -0.102        | 0.239         | 0.155  |
| Caffeic acid              | 0.027       | 0.358         | -0.037          | 0.660         | <b>0.809</b> | 1             | <b>0.862</b> | <b>-0.780</b>  | 0.440            | 0.456          | 0.605                 | 0.548         | 0.195         | 0.294                     | -0.552        | <b>0.758</b>  | 0.395         | -0.212        | -0.175 |
| kaemferol                 | 0.183       | 0.553         | -0.371          | 0.456         | 0.574        | <b>0.862</b>  | 1            | -0.674         | 0.424            | 0.183          | 0.381                 | 0.191         | -0.172        | -0.105                    | -0.328        | 0.542         | 0.385         | -0.103        | -0.189 |
| Absciscic acid            | -0.143      | -0.559        | 0.370           | -0.488        | -0.422       | <b>-0.780</b> | -0.674       | 1              | -0.479           | -0.248         | -0.551                | -0.751        | -0.481        | -0.481                    | 0.653         | <b>-0.776</b> | -0.653        | 0.390         | 0.489  |
| Chlorogenic acid          | -0.117      | 0.708         | -0.495          | -0.294        | 0.443        | 0.440         | 0.424        | -0.479         | 1                | 0.686          | 0.751                 | 0.532         | 0.407         | 0.118                     | -0.244        | 0.316         | 0.038         | 0.384         | 0.455  |
| t-Ferulic acid            | -0.037      | 0.385         | -0.022          | -0.124        | 0.534        | 0.456         | 0.183        | -0.248         | 0.686            | 1              | <b>0.831</b>          | 0.653         | 0.626         | 0.538                     | -0.563        | 0.552         | 0.118         | 0.035         | 0.567  |
| 4-Hydroxybenzoic acid     | -0.283      | 0.525         | -0.179          | 0.102         | 0.475        | 0.605         | 0.381        | -0.551         | 0.751            | <b>0.831</b>   | 1                     | 0.730         | 0.671         | 0.540                     | -0.631        | 0.577         | 0.188         | -0.036        | 0.385  |
| Ellagic acid              | 0.055       | 0.385         | -0.104          | 0.228         | 0.403        | 0.548         | 0.191        | -0.751         | 0.532            | 0.653          | 0.730                 | 1             | <b>0.909</b>  | <b>0.861</b>              | <b>-0.784</b> | <b>0.794</b>  | 0.526         | -0.369        | -0.146 |
| Cinnamic acid             | -0.010      | 0.295         | -0.080          | -0.020        | 0.081        | 0.195         | -0.172       | -0.481         | 0.407            | 0.626          | 0.671                 | <b>0.909</b>  | 1             | <b>0.915</b>              | -0.730        | 0.598         | 0.423         | -0.378        | 0.001  |
| 3,4-Dihydroxybenzoic acid | 0.162       | 0.153         | 0.077           | 0.236         | 0.108        | 0.294         | -0.105       | -0.481         | 0.118            | 0.538          | 0.540                 | <b>0.861</b>  | <b>0.915</b>  | 1                         | <b>-0.860</b> | 0.748         | 0.596         | -0.665        | -0.216 |
| catechin                  | -0.389      | -0.506        | 0.246           | -0.280        | -0.163       | -0.552        | -0.328       | 0.653          | -0.244           | -0.563         | -0.631                | <b>-0.784</b> | -0.730        | <b>-0.860</b>             | 1             | <b>-0.931</b> | <b>-0.825</b> | <b>0.769</b>  | 0.254  |
| quercetin                 | 0.448       | 0.494         | -0.205          | 0.420         | 0.428        | <b>0.758</b>  | 0.542        | <b>-0.776</b>  | 0.316            | 0.552          | 0.577                 | <b>0.794</b>  | 0.598         | 0.748                     | <b>-0.931</b> | 1             | <b>0.819</b>  | -0.670        | -0.344 |
| isorhamnetin              | 0.745       | 0.573         | -0.502          | 0.208         | -0.102       | 0.395         | 0.385        | -0.653         | 0.038            | 0.118          | 0.188                 | 0.526         | 0.423         | 0.596                     | <b>-0.825</b> | <b>0.819</b>  | 1             | <b>-0.859</b> | -0.625 |
| epi-catechin              | -0.562      | -0.159        | 0.113           | -0.391        | 0.239        | -0.212        | -0.103       | 0.390          | 0.384            | 0.035          | -0.036                | -0.369        | -0.378        | -0.665                    | <b>0.769</b>  | -0.670        | <b>-0.859</b> | 1             | 0.657  |
| rutin                     | -0.429      | 0.048         | 0.079           | -0.541        | 0.155        | -0.175        | -0.189       | 0.489          | 0.455            | 0.567          | 0.385                 | -0.146        | 0.001         | -0.216                    | 0.254         | -0.344        | -0.625        | 0.657         | 1      |

Values in bold are different from 0 with a significance level  $\alpha=0.05$
